# Supplementary material for: A Comprehensive Strategy Combining Feature Selection and Local Optimization Algorithm to Optimize the Design of Low-Density Chip for Genomic Selection
Source: MDPI journal article supplement (doi:10.3390/agriculture13030614), 2023-03-03
Supplement: s1 [file s1]

Archive with 1 entries (1 files):
- agriculture-2236928-supplementary.pdf
