# Supplementary material for: A Comprehensive Strategy Combining Feature Selection and Local Optimization Algorithm to Optimize the Design of Low-Density Chip for Genomic Selection
Source: MDPI journal article supplement (doi:10.3390/agriculture13030614), 2023-03-03
Supplement: s1 [file s1 › agriculture-2236928-supplementary.pdf]

**Table S1.** Structure of validation population in Imputation.

|              | Duroc | Landrace | Yorkshire |
|--------------|-------|----------|-----------|
| Sire only    | 75    | 142      | 210       |
| Dam only     | 2     | 0        | 0         |
| Sire and Dam | 313   | 355      | 535       |
| No parent    | 0     | 0        | 0         |
| Total        | 390   | 497      | 745       |

**Table S2.** Heritability of each trait for each breed.

| Trait | Breed  |        |        |
|-------|--------|--------|--------|
|       | DD     | LL     | YY     |
| AGE   | 0.1502 | 0.2323 | 0.2543 |
| BF    | 0.3530 | 0.4131 | 0.4139 |

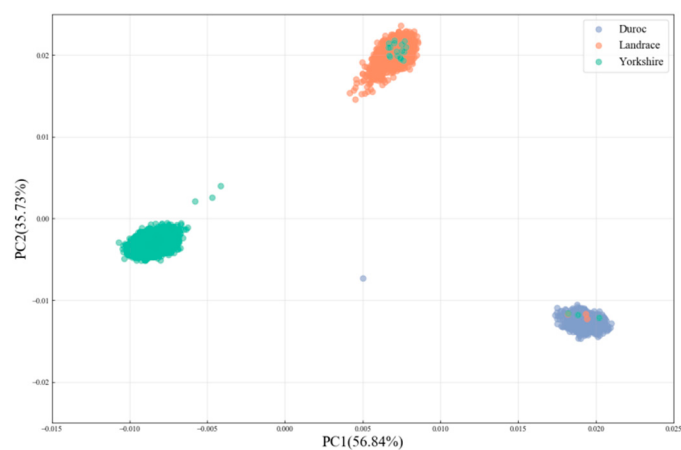**Figure S1.** Principal coordinate analysis (PCA) of raw genotypes of pigs from three breeds. One point corresponds to a single animal. Duroc (DD), Landrace (LL) and Yorkshire (YY) are shown in blue, orange, and green respectively. PC1=56.84%, PC2=35.73%.
